# Supplementary material for: 2D amorphous iron phosphate nanosheets with high rate capability and ultra-long cycle life for sodium ion batteries
Source: Royal Society of Chemistry journal article supplement (doi:10.1039/c6ta00454g), 2016-01-01
Supplement: c6ta00454g1.pdf [file c6ta00454g1.pdf]

## **Supporting Information**

### **2D amorphous iron phosphate nanosheets with high rate capability and ultra-long cycle life for sodium ion batteries**

Tongchao Liu, Yandong Duan, Guangxing Zhang, Maofan Li, Yancong Feng,  
Jiangtao Hu, Jiaxin Zheng, Jitao Chen and Feng Pan\*

School of Advanced Materials, Peking University Shenzhen Graduate School,  
Shenzhen, 518055, China

\*Corresponding author: [panfeng@pkusz.edu.cn](mailto:panfeng@pkusz.edu.cn)

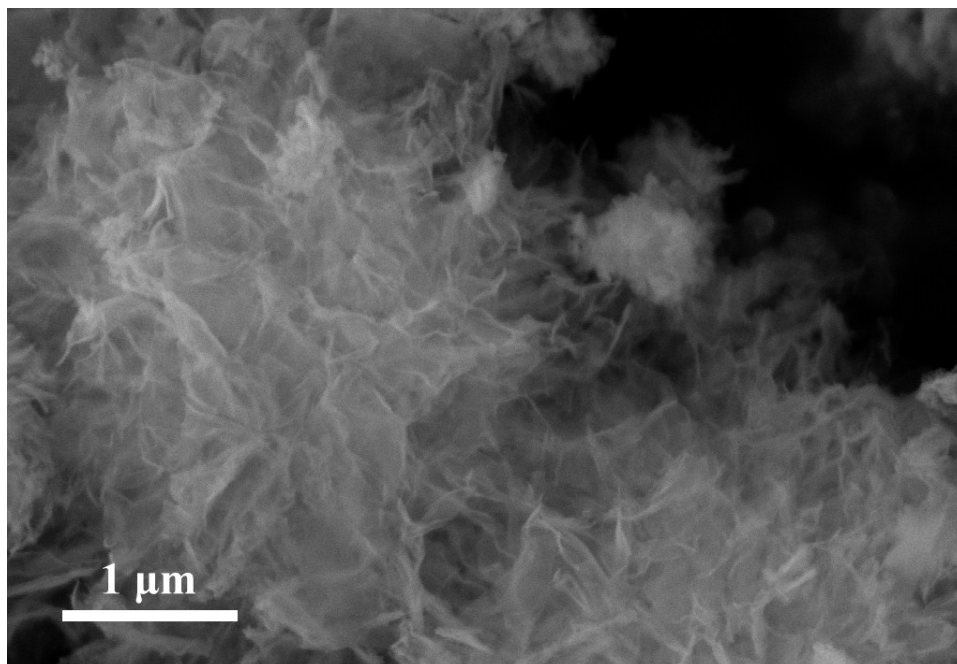

**Figure S1** SEM images of the 2D nanosheets.

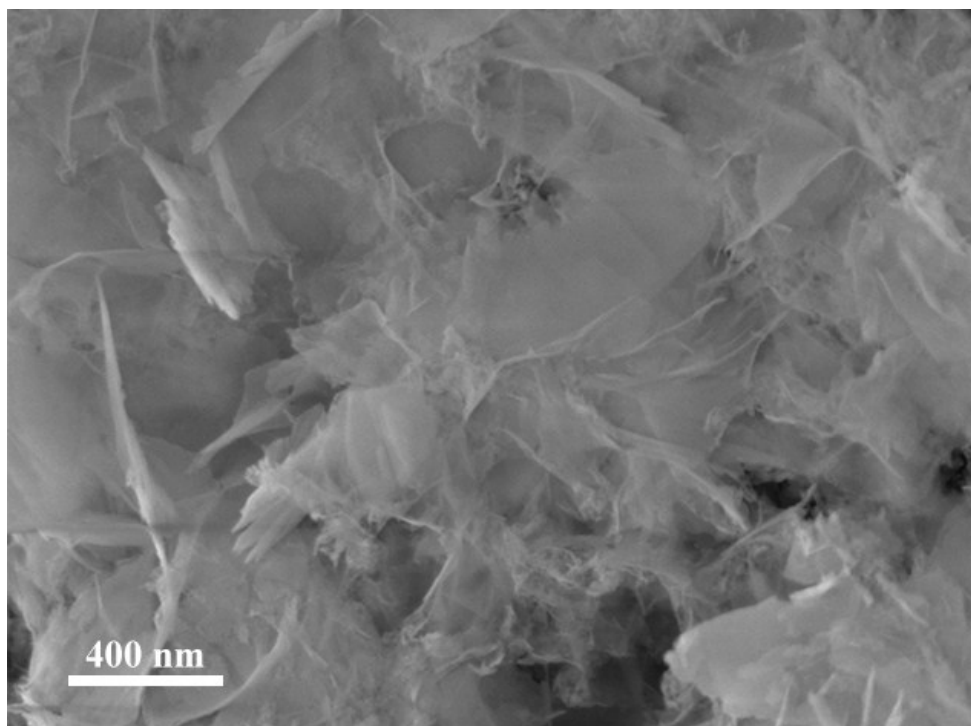

**Figure S2** SEM images of the 2D nanosheets.

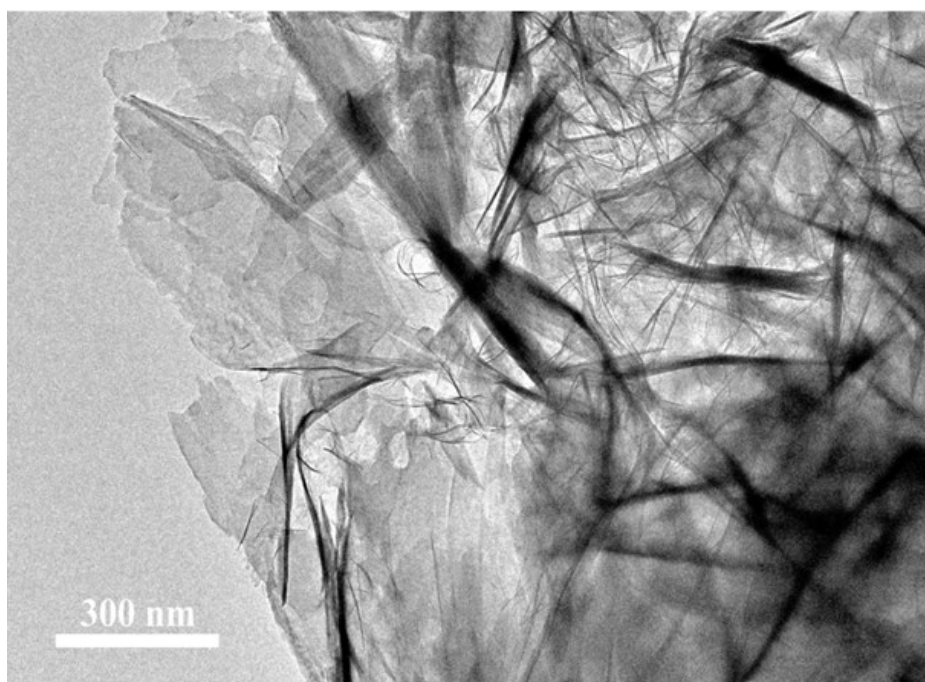

**Figure S3** TEM image of 2D nanosheets.

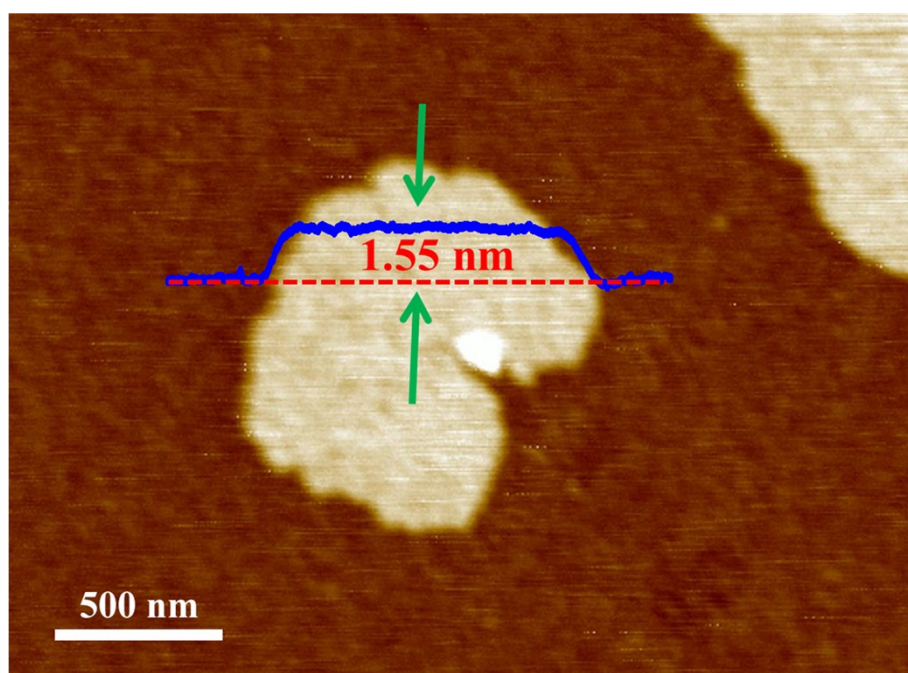

**Figure S4** AFM image of a typical nanosheet with a thickness of 1.55 nm, corresponding to two atomic layers.

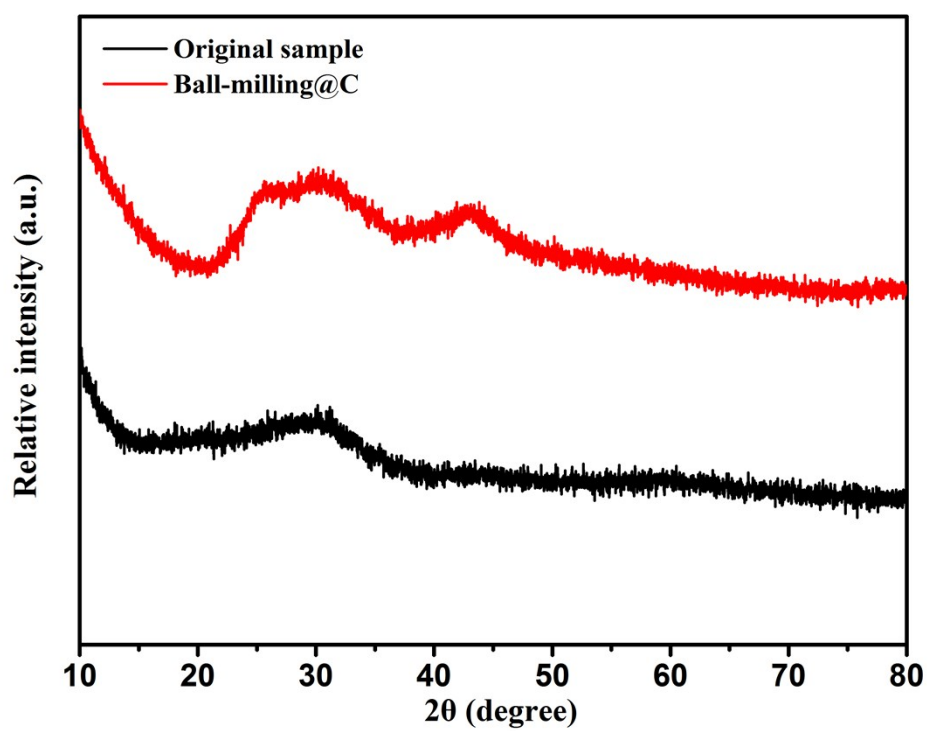

**Figure S5** XRD of samples for 2D nanosheets and 2D nanosheets@C.

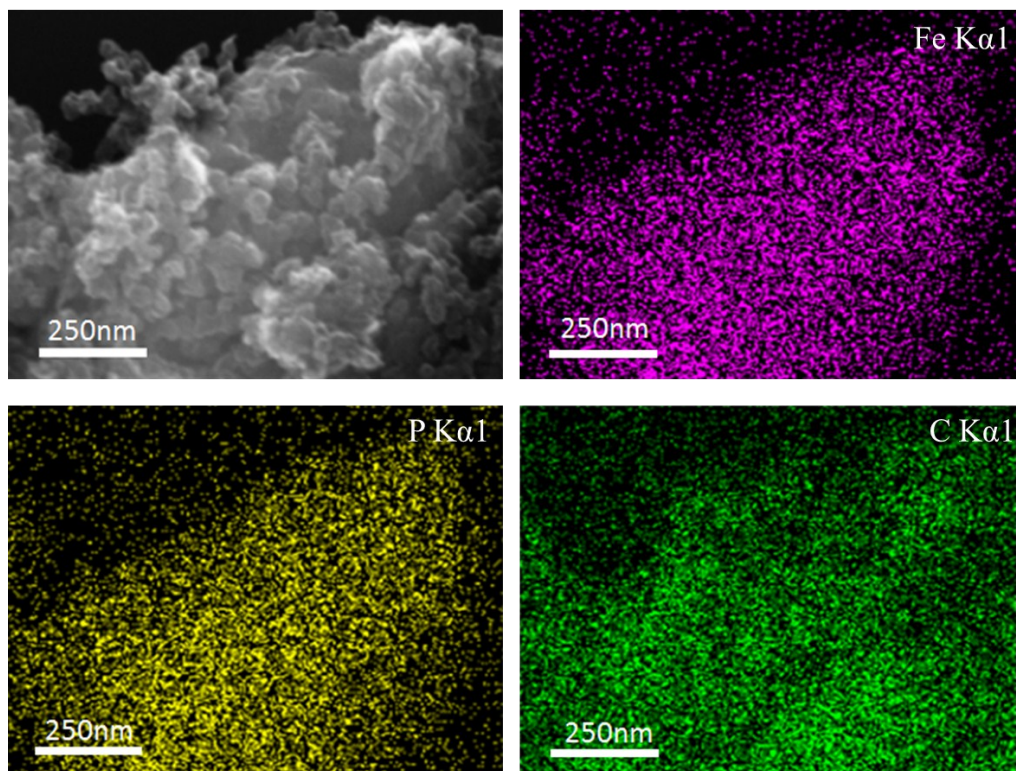

**Figure S6** EDS mapping images for the mixture of nanosheets and carbon black.

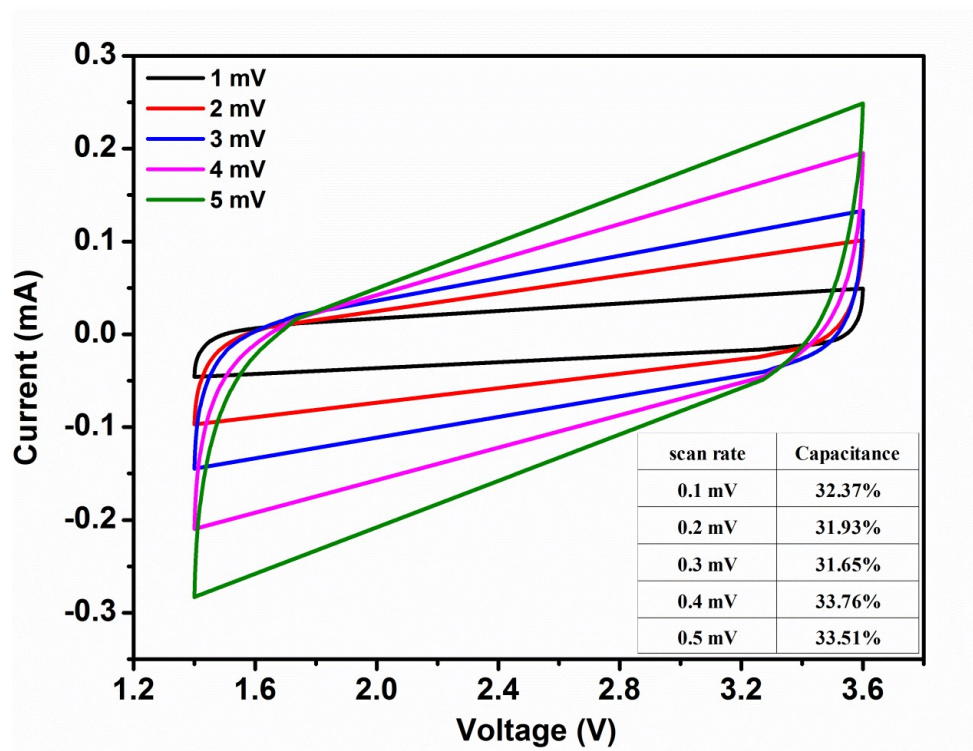

**Figure S7** Capacitance contribution of CV curves at different scan rates.

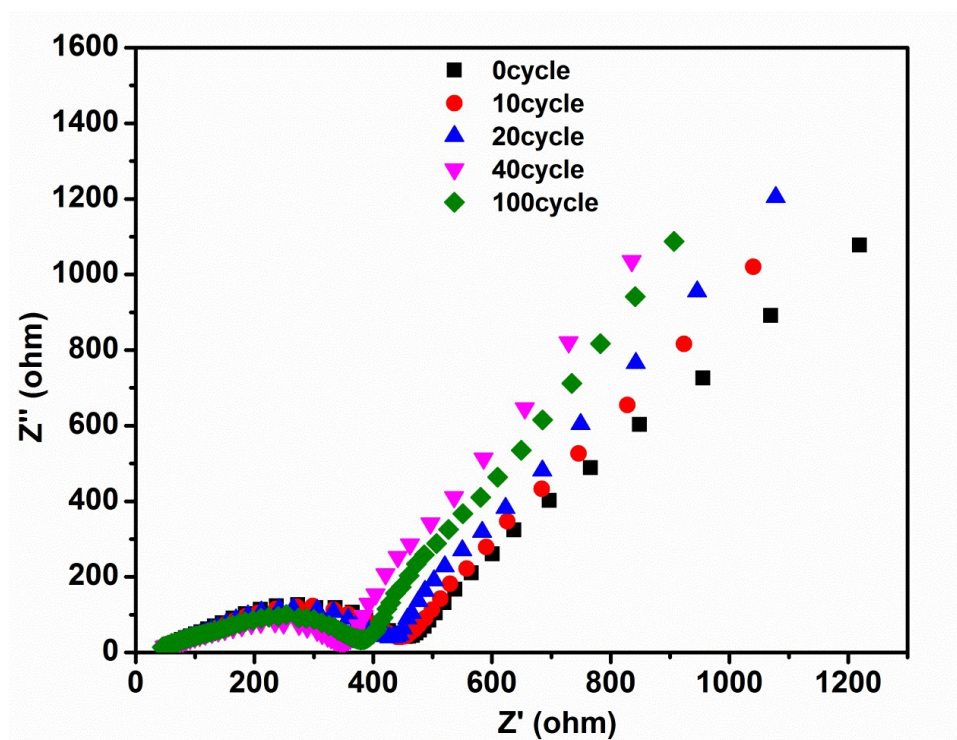

**Figure S8** Electrochemical impedance spectroscopy (EIS) for 0, 10, 20, 40 and 100 charge/discharge cycles.

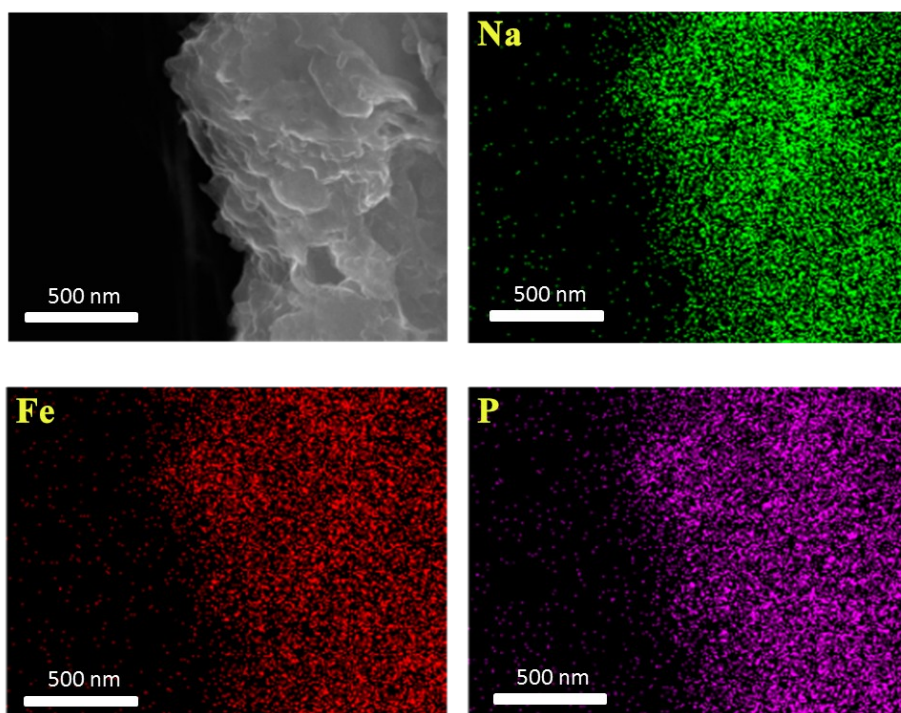

**Figure S9** EDS mapping images for the mixture of nanosheets and carbon black.

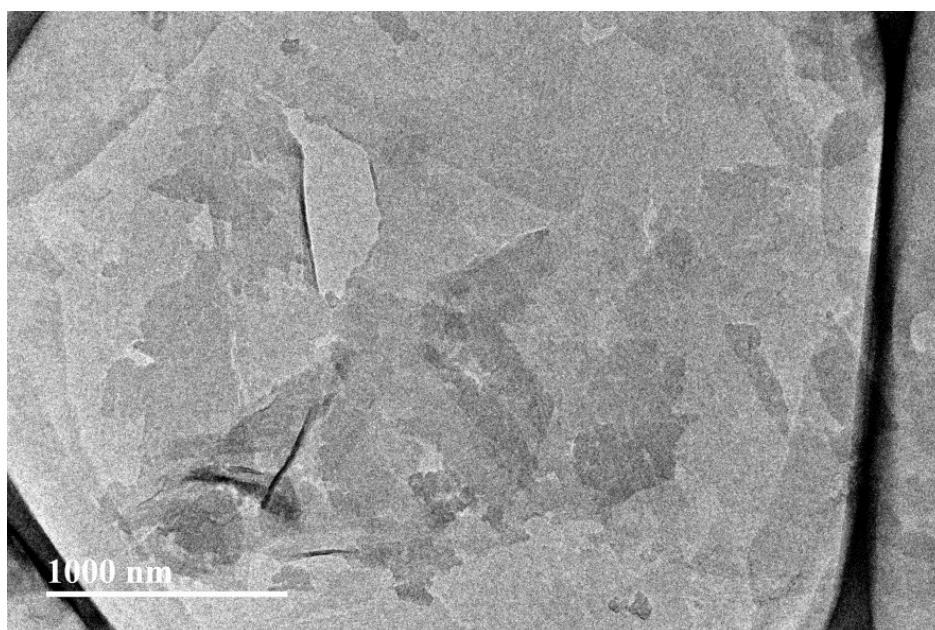

**Figure S10** TEM image for the nanosheets after 1000 charge/discharge cycles.

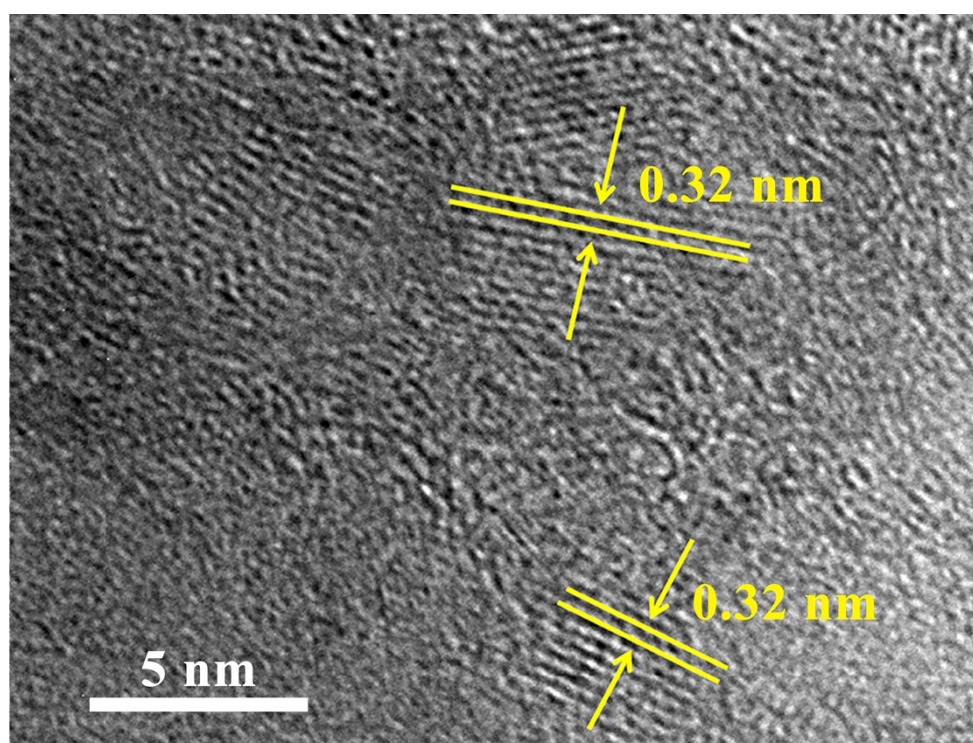

**Figure S11** HR-TEM image for crystallization of 2D sheets.
